# Supplementary material
Source: PubMed Central journal article supplement (PMC8759028)
Supplement: jamaoncol-e217015-s002.pdf [file jamaoncol-e217015-s002.pdf]

## Data Sharing Statement

Arrieta. Association of BMI With Benefit of Metformin Plus Epidermal Growth Factor Receptor-Tyrosine Kinase Inhibitors in Patients With Advanced Lung Adenocarcinoma. *JAMA Oncol.* Published January 13, 2022. doi:10.1001/jamaoncol.2021.7015

### Data

**Data available:** Yes

**Data types:** Deidentified participant data

**How to access data:** [ogarrieta@gmail.com](mailto:ogarrieta@gmail.com)

**When available:** With publication

### Supporting Documents

**Document types:** None

### Additional Information

**Who can access the data:** researchers whose proposed use of the data has been approved

**Types of analyses:** for any purpose

**Mechanisms of data availability:** after approval of a proposal

**Any additional restrictions:** No additional restrictions
